# Supplementary material
Source: Elsevier journal article supplement (https://www.sciencedirect.com/science/article/pii/S2444382420301243)
Supplement: mmc4 [file S2444382420301243:mmc4.doc]

**Table S4 Topic of the studies.**

| Topic | No. of Articles |
| --- | --- |
| Treatment | 23 |
| Mechanism and Etiology | 16 |
| Diagnosis | 8 |
| Epidemiologic Study | 7 |
| Genetics | 6 |
|  |  |
